# Supplementary material for: Using shear wave elastography to assess uterine tonicity after vaginal delivery
Source: PubMed Central journal article supplement (PMC8129155; doi:10.1038/s41598-021-89756-6), 2021-05-17
Supplement: 41598_2021_89756_MOESM1_ESM.pdf [file 41598_2021_89756_MOESM1_ESM.pdf]

## SUPPLEMENTARY INFORMATION

### Title: Using shear wave elastography to assess uterine tonicity after vaginal delivery

Joanna SICHITIU MD,<sup>1</sup> Jean-Yves MEUWLY MD,<sup>2</sup> David BAUD MD-PhD,<sup>1</sup>

David DESSEAUVÉ MPH MD PhD<sup>1</sup>

### Figure S1 Midsagittal view of the uterus

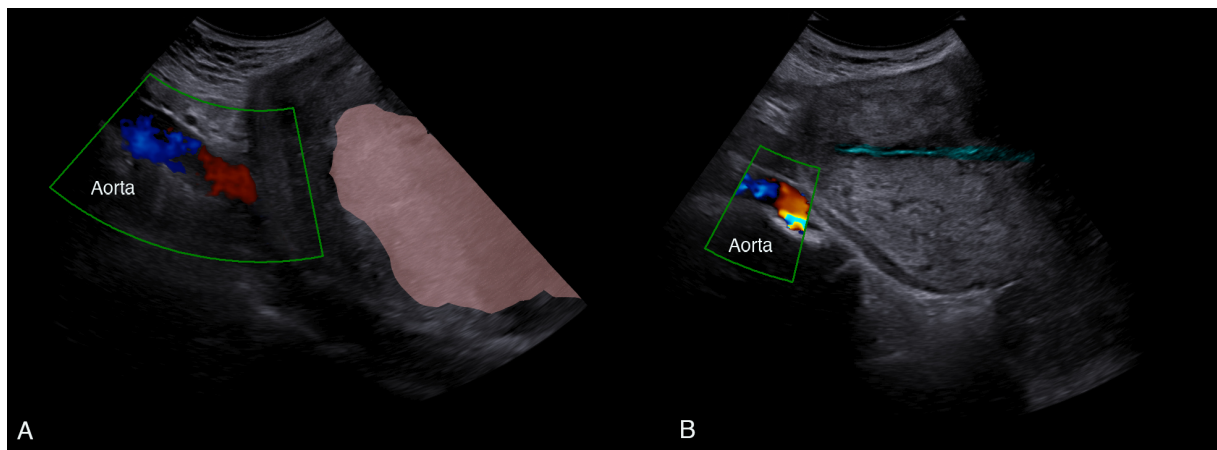

A. Before placental expulsion. B After placental expulsion. Pink outline illustrates the placenta. Blue outline illustrates the uterine cavity.
